# Supplementary material
Source: publisher figshare collection journal article supplement (https://diabetesjournals.figshare.com/articles/dataset/_/22812284)
Supplement: Supplementary file 3 [file 1]

**Supplementary table 1 Primer sequence for RT-qPCR**

| Genes          | GenBank ID     | Forward Sequence         | Reverse Sequence         |
|----------------|----------------|--------------------------|--------------------------|
| <i>β-Actin</i> | NM_031144.3    | TCATGAAGTGTGACGTTGACATCC | GTAAAACGCAGCTCAGTAACAGTC |
| <i>Bcatm</i>   | NM_022400.2    | CAGGACTTGGGGTGAGTTCC     | GCCTGAGAACGGAGATCGAG     |
| <i>Bckdha</i>  | NM_012782.1    | CTGTTCATGGCCCAGTGCTA     | TTGACCTCATCCACCGAACG     |
| <i>Acot1</i>   | NM_031315.2    | CCTCCTTACTTCCCACTGTG     | GACACCCCATGACTCTTACC     |
| <i>Acot2</i>   | NM_138907.3    | CGAGTTCTATGCCAGAGAGG     | CACAGTGGGAAGTAAGGAGG     |
| <i>Acot3</i>   | NM_001108041.1 | GAAGGAGCTGACCAGAAGAG     | CCTCTCTGGCATAGAACTCG     |
| <i>Acot4</i>   | NM_001109440.2 | CAATAGAGAAGGCCAAGGGG     | CCAGTCCCAGGGTAAGAGAT     |
| <i>Acot5</i>   | NM_001079709.1 | CCAGATCATCTGCTACCCAG     | CTCCCCCTCCAAGGATGATAG    |
| <i>Ppara</i>   | NM_013196.2    | GATTTCTCAGTCCCTCGGAG     | GAGAGAGGGTGTCTGTGATG     |
| <i>Scd</i>     | NM_139192.2    | CTTCCCCTACGACTACTCTG     | CTACTCTTGTGGCTCCCATC     |
| <i>Acat2</i>   | NM_001006995.1 | GACCCCGTCGTCATCATCTC     | TGGGACACAACAGCAACCTT     |
| <i>Abcg5</i>   | NM_053754.2    | GTTCCATGACCCAAGGGATC     | CTGGACTCGGAGAAGGTAG      |
| <i>Abcg8</i>   | NM_130414.2    | GGGACTGTACTCCAGGATG      | GTGAGATCTCTGACCTCCAG     |
| <i>Cyp7a1</i>  | NM_012942.2    | GCTCTCCACCTTTGACGACA     | GGACGGCAAAGAGTCTTCCA     |
| <i>Cyp7b1</i>  | NM_019138.1    | CTATGGAAGTCCTGCGTGAC     | GGATGATGCTGGAGTAGGAG     |
| <i>Cyp8b1</i>  | NM_031241.2    | CTGTGGGGTTCACTGCTAGG     | GCTCAGGAAGCCAGCCTTAA     |
| <i>Fasn</i>    | NM_017332.2    | ATCGTGGGCATCAACTCGTT     | GCAGGATGGACTCACGGAAA     |
| <i>Acaca</i>   | NM_022193.1    | CTGGGTAGACTCTGAGGATC     | CGAAGGTTCTCTGCTCCAAG     |
| <i>Acacb</i>   | NM_053922.2    | GGAGTACCTATACAGCCAGG     | GGGACTCTCCGTACAGAAG      |
| <i>Me1</i>     | NM_012600.3    | CTGAGTGTTCTGCAGAGGAG     | CTCCAGGGAACACATAGGAG     |

F: Forward primer; R: Reverse primer. Bcatm, branched chain amino acid transaminase 2; Bckdha, branched chain keto acid dehydrogenase E1 subunit alpha; Acot1, acyl-CoA thioesterase 1; Acot2, acyl-CoA thioesterase 2; Acot3, acyl-CoA thioesterase 3; Acot4, acyl-CoA thioesterase 4; Acot5, acyl-CoA thioesterase 5; Ppara, peroxisome proliferator activated receptor alpha; Scd, stearoyl-CoA desaturase; Acat2, acetyl-CoA acetyltransferase 2; Abcg5, ATP binding cassette subfamily G member 5; Abcg8, ATP binding cassette subfamily G member 8; Cyp7a1, cytochrome P450 family 7 subfamily A member 1; Cyp7b1, cytochrome P450 family 7 subfamily B member 1; Cyp8b1, cytochrome P450 family 8 subfamily B member 1; Fasn, fatty acid synthase; Acaca, acetyl-CoA carboxylase alpha; Acacb, acetyl-CoA carboxylase beta; Me1, malic enzyme 1.
