# Supplementary material
Source: publisher figshare collection journal article supplement (https://diabetesjournals.figshare.com/articles/dataset/_/22812284)
Supplement: Supplementary file 4 [file 1]

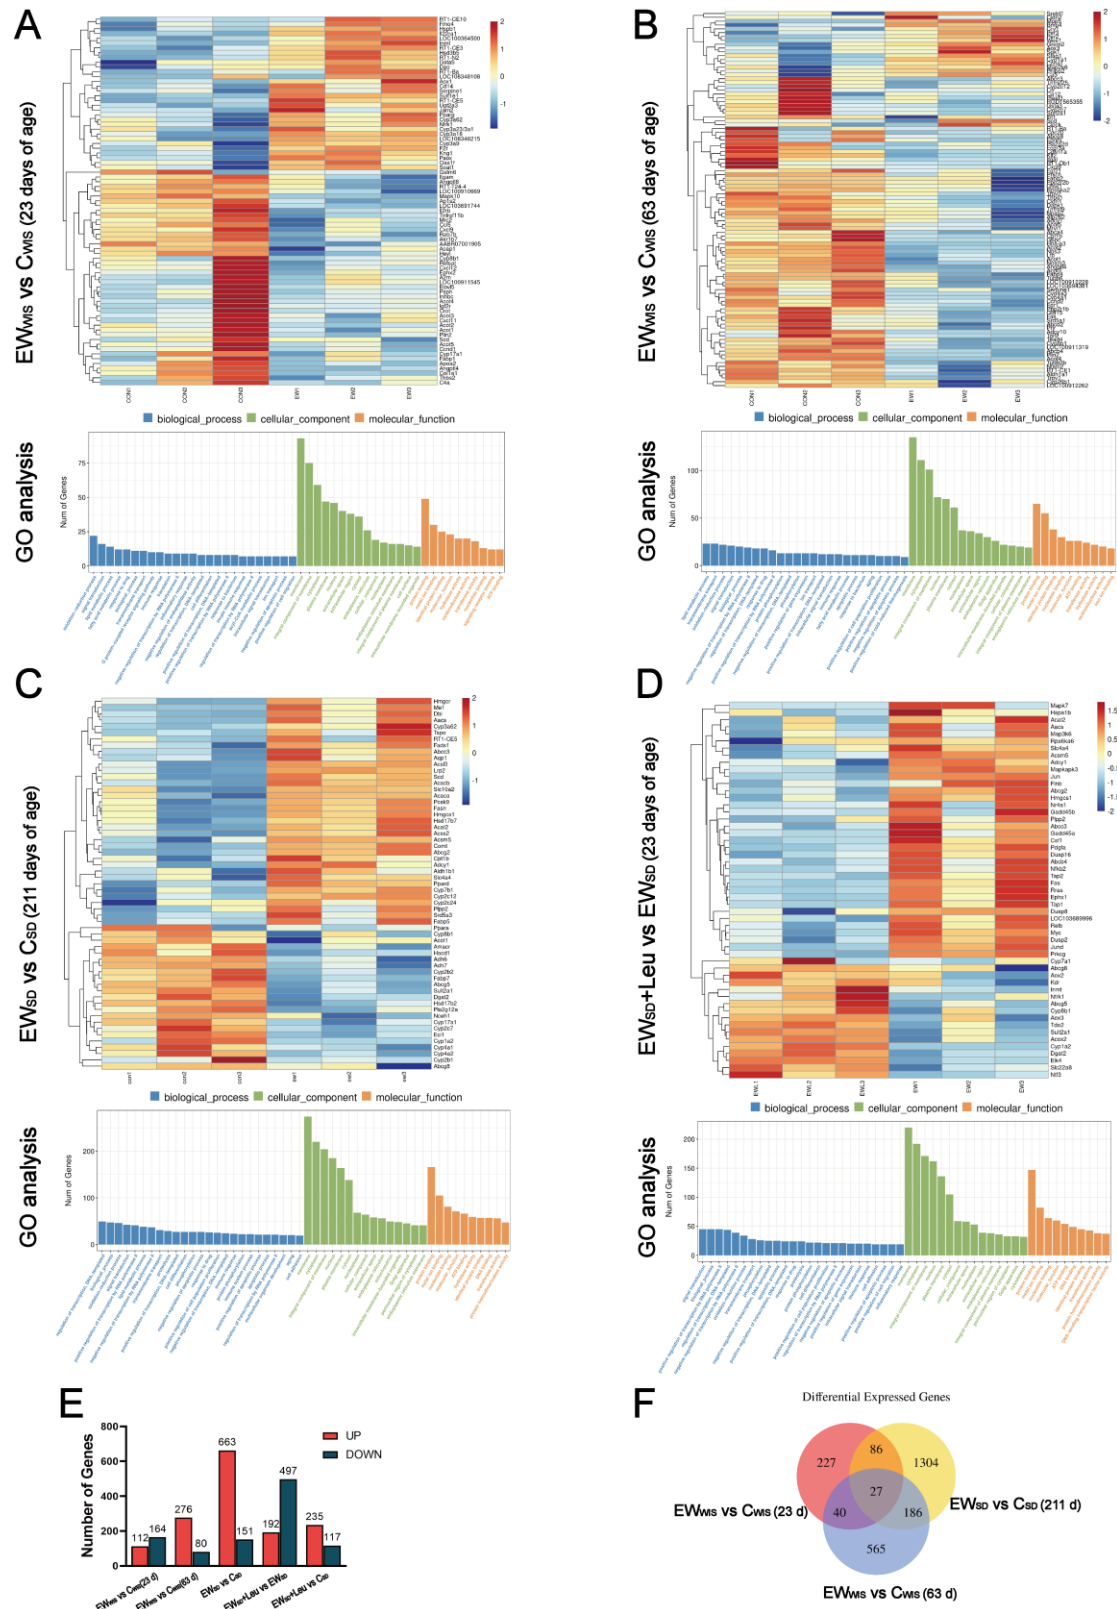

**Supplementary Fig. 2. Supplemental observations of differentially expressed genes (DEG) in three transcriptome analyses.** *A-D*: Hierarchical clustering heat map and GO enrichment analysis of DEGs in EW<sub>WIS</sub> vs. C<sub>WIS</sub> (d 23), EW<sub>WIS</sub> vs. C<sub>WIS</sub> (d 63), EW<sub>SD</sub> vs. C<sub>SD</sub> (d 211), and EW<sub>SD</sub>+Leu vs. EW<sub>SD</sub> (d 211). *E*: Quantity statistics of DEGs in each group. *F*: Venn diagram of

the DEGs among  $EW_{WIS}$  vs.  $C_{WIS}$  (d 23),  $EW_{WIS}$  vs.  $C_{WIS}$  (d 63), and  $EW_{SD}$  vs.  $C_{SD}$  (d 211). The GO enrichment analysis was composed of three parts: biological process (BP), cellular component (CC), and GO molecular function (MF).
