# Supplementary material
Source: publisher figshare collection journal article supplement (https://diabetesjournals.figshare.com/articles/dataset/_/22812284)
Supplement: Supplementary file 5 [file 1]

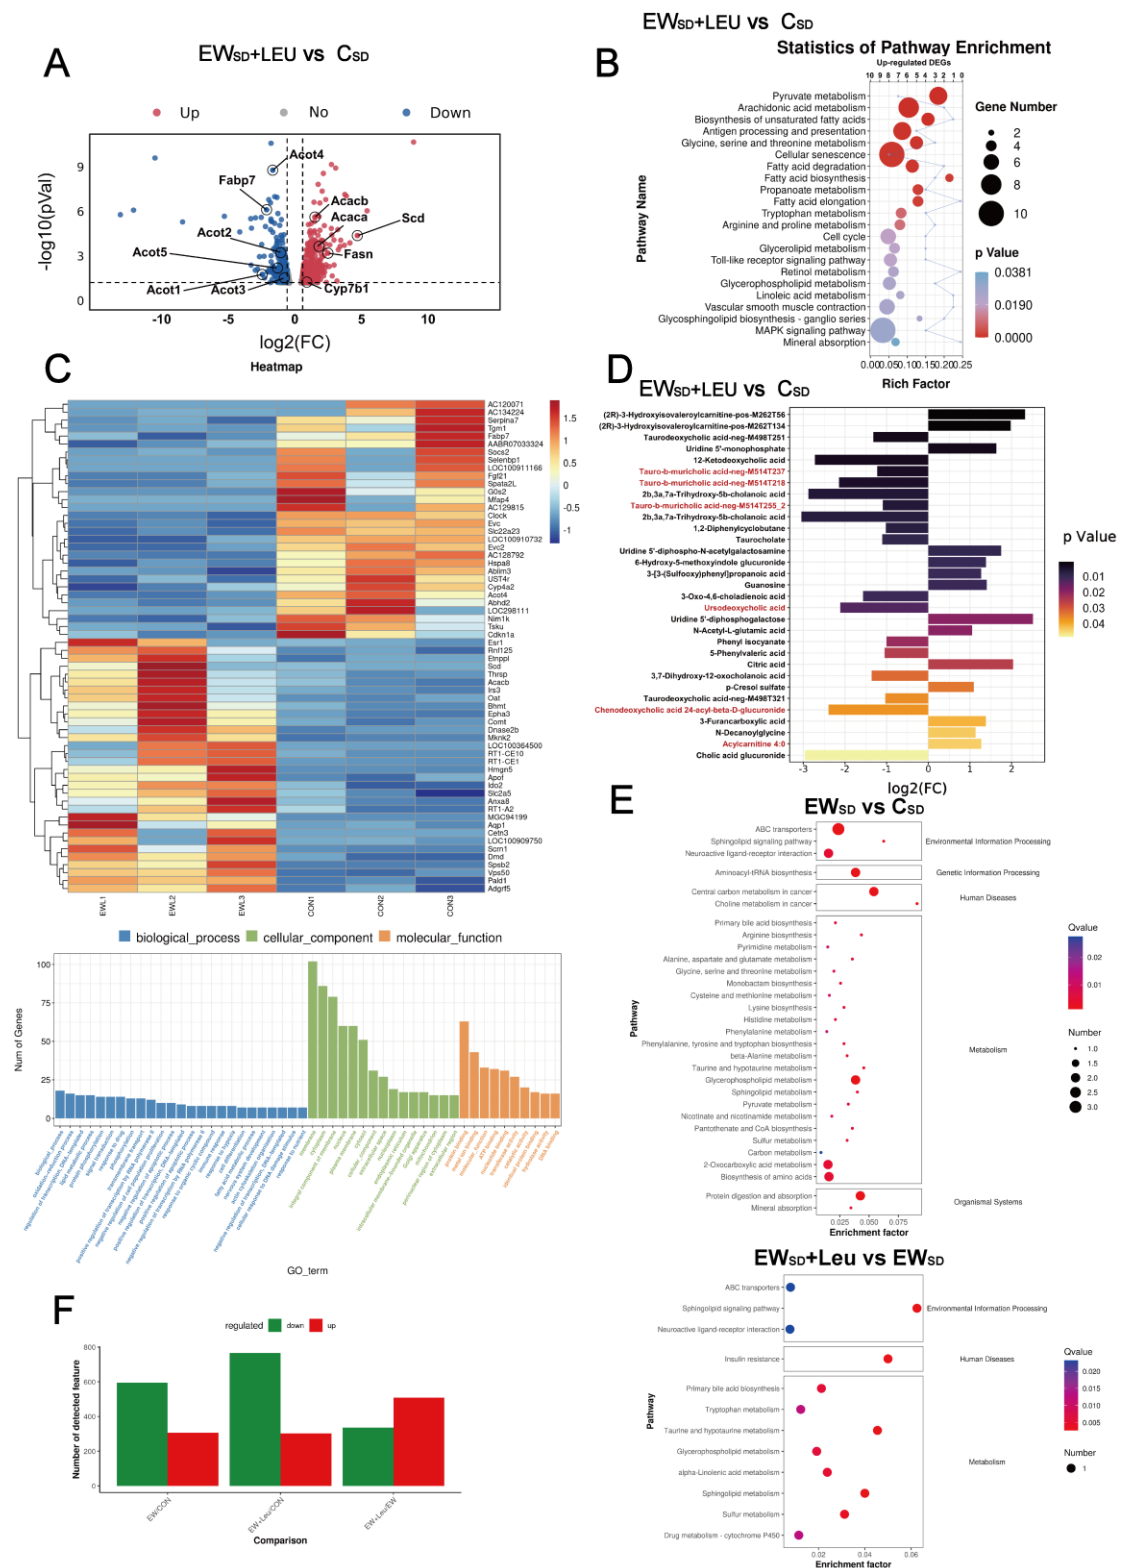

**Supplementary Fig. 3. Supplementary observations on transcriptome analysis and metabolomics analysis in the liver from adult SD rats. A:** Volcano plot of liver differential expressed genes (DEGs) in EW<sub>SD</sub>+Leu vs. C<sub>SD</sub>. **B:** KEGG enrichment analysis of liver DEGs in EW<sub>SD</sub>+Leu vs. C<sub>SD</sub>. **C:** Hierarchical clustering heat map and GO enrichment analysis of

DEGs in EW<sub>SD</sub>+Leu vs. C<sub>SD</sub>. *D*: Variations of the top 31 enriched metabolites in EW<sub>SD</sub>+Leu vs. C<sub>SD</sub>. *E*: KEGG enrichment analysis of liver metabolomics analysis in EW<sub>SD</sub> vs. C<sub>SD</sub> and EW<sub>SD</sub>+Leu vs. EW<sub>SD</sub>. *F*: Quantity statistics of different metabolites in each group.
